# Supplementary material
Source: Springer Nature journal article supplement (https://www.springermedizin.de/resource/supplementary/12891_2012_1697_MOESM1_ESM.pdf/9508388)

Change in sum of BML size scores in the medial tibiofemoral compartment

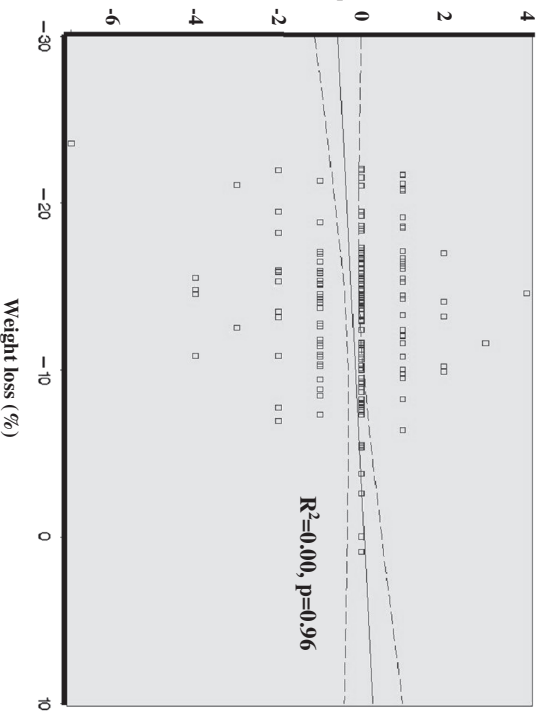

Supplement: MOESM1 [file 9508388]
